# Supplementary material
Source: Royal Society of Chemistry journal article supplement (doi:10.1039/d6ja00007j)
Supplement: d6ja00007j2.xlsx [file d6ja00007j2.xlsx]

## Sheet: TABLE S2
TABLE S2: δCa values of Ca-spiked reference material matrices (matrice extracted through chromatography, spiked with 50 µg of Ca from alpha-Ottawa, purified a second time through identical chromatography)
		δCaalpha-Ottawa mean values (‰)			2SD (‰)			2SE (‰)
ID	n	44/42	43/42	44/43	44/42	43/42	44/43	44/42	43/42
All	35	0.01	0.02	-0.01	0.17	0.24	0.15	0.03	0.04
CACB1	1	-0.02	0.03	-0.04	-	-	-	-	-
DOLT5	6	0	-0.01	0.01	0.16	0.23	0.13	0.07	0.1
DORM5	11	0.02	0.07	-0.05	0.23	0.26	0.15	0.07	0.08
SRM1486	5	0.01	0.05	-0.04	0.12	0.14	0.14	0.06	0.06
TORT3	7	-0.02	-0.02	0.01	0.13	0.26	0.14	0.05	0.1
IAPSO	5	0.03	-0.01	0.04	0.17	0.28	0.16	0.07	0.12

## Sheet: TABLE S4
TABLE S4: Fe, K, Mg and Al doping experiments (δCa values reported relative to alpha-Ottawa)
		δCaalpha-Ottawa mean values (‰)			δCa 2SD values (‰)			δCa 2SE values (‰)		X/Ca
ID	n	44/42	43/42	44/43	44/42	43/42	44/43	44/42	43/42
Fe10-1	4	-0.0597284	-0.0814398	0.0217159	0.122751	0.0992457	0.213522	0.0613755	0.0496229	0.1
Fe10-2	3	0.00357574	0.0459137	-0.0423396	0.105754	0.119324	0.143291	0.0610568	0.068892	0.01
Fe10-3	4	0.00477343	-0.0106335	0.015416	0.10951	0.277522	0.18694	0.0547552	0.138761	0.001
Fe10-4	7	0.00943179	0.0869535	-0.0775057	0.0924534	0.225863	0.242473	0.0349441	0.0853683	0.0001
Fe10-5	6	-0.0196581	-0.044988	0.0253314	0.259369	0.310726	0.123931	0.105887	0.126853	1e-05
Fe10-6	6	-0.00892	0.00325646	-0.0121752	0.176442	0.211943	0.141247	0.0720319	0.0865252	1e-06
K10-1	6	-0.039433	-0.0331683	-0.00625716	0.133967	0.206599	0.254304	0.0546919	0.0843437	0.1
K10-2	5	-0.0314771	0.00442067	-0.0358889	0.200813	0.280786	0.258118	0.0898064	0.125571	0.01
K10-3	6	-0.0261069	0.0158962	-0.0419925	0.0843154	0.291713	0.243823	0.0344216	0.119091	0.001
K10-4	4	-0.00769625	-0.0625269	0.0548371	0.122217	0.216595	0.134855	0.0611084	0.108298	0.0001
K10-5	9	-0.0230784	-0.00248793	-0.0205811	0.182022	0.316884	0.252697	0.0606739	0.105628	1e-05
K10-6	7	-0.0402148	-0.0457026	0.0054927	0.154768	0.155671	0.246107	0.0584968	0.0588381	1e-06
Mg10-1	4	0.0109165	-0.0395403	0.0504522	0.0939219	0.135127	0.0849822	0.0469609	0.0675635	0.1
Mg10-2	3	-0.0110884	0.0686442	-0.0797254	0.106602	0.0938403	0.195763	0.0615467	0.0541787	0.01
Mg10-3	4	-0.0159891	0.0176036	-0.0335921	0.136579	0.193433	0.110276	0.0682896	0.0967167	0.001
Mg10-4	3	-0.0133981	0.035199	-0.0485895	0.213647	0.328501	0.126142	0.123349	0.18966	0.0001
Mg10-5	4	-0.000706164	-0.0498587	0.049162	0.178701	0.328911	0.194793	0.0893503	0.164456	1e-05
Mg10-6	8	-0.0268931	-0.000442806	-0.0264479	0.222513	0.253718	0.148232	0.0786702	0.0897027	1e-06
Al10-1	6	-0.104108	-0.109431	0.00533302	0.12642	0.262895	0.25246	0.0516106	0.107327	0.1
Al10-2	7	0.0191434	0.0476738	-0.0285319	0.225943	0.180641	0.132155	0.0853982	0.068276	0.01
Al10-3	4	-0.00340877	0.049582	-0.0529866	0.122166	0.175451	0.0627258	0.0610828	0.0877256	0.001
Al10-4	4	0.0338095	-0.0837972	0.117614	0.22017	0.231134	0.0625002	0.110085	0.115567	0.0001
Al10-5	5	-0.00329361	-0.113007	0.109742	0.100244	0.26589	0.363293	0.0448306	0.11891	1e-05
Al10-6	4	-0.0113326	0.0220159	-0.0333368	0.229533	0.39239	0.167291	0.114766	0.196195	1e-06

## Sheet: TABLE S3
TABLE S3: δ44/42Ca data set for SRM1486, SRM1400 and IAPSO (this study and literature). SRM1486 and IAPSO data are used for conversions between delta scales.
Reference material	Method	n	δ44/42Ca (‰)	2SD	2SE	δ44/42Ca (‰)	2SD	2SE	δ44/42Ca (‰)	2SD	2SE	δ44/42Ca (‰)	2SD	2SE	Δ44/42Ca (‰)														References
			rel. ICP Ca Lyon			rel. WIGL			rel. SRM915a			rel. alpha-Ottawa			Lyon-SRM915a	2SD	WIGL-SRM915a	2SD	WIGL-Lyon	2SD	Ottawa-Lyon	2SD	Ottawa-WIGL	2SD	Ottawa-SRM915a (excluding Lyon & WIGL)	2SD	Ottawa-SRM915a	2SD
SRM1486	Reported rel to ICP Ca Lyon, converted to SRM915a	101	-1.047	0.13	0.0129355				-0.529						-0.551784	0.140825					0.0433674	0.204341					-0.474633		Martin, J. E., Tacail, T., Cerling, T. E., & Balter, V. (2018). Calcium isotopes in enamel of modern and Plio-Pleistocene East African mammals. Earth and Planetary Science Letters, 503, 227–235. https://doi.org/10.1016/j.epsl.2018.09.026
	Reported rel to ICP Ca Lyon, converted to SRM915a	404	-1.0243	0.1251	0.0061				-0.5063						-0.529084	0.136315					0.0206674	0.201259					-0.497333		Hassler et al. 2018 Proc. Roy. Soc. B 285(1876), 20180197.;Martin et al. 2017a Curr. Biol. 27,1641-1644.; Martin et al. 2017b Palaeontology 60, 485-502.; Tacail et al. 2014 J. Anal. At. Spec. 29(3), 529-535.; Tacail et al. 2016 J. Anal. At. Spec. 31(1), 152-162.; Tacail et al. 2017 Proc. Nat. Acad. Sci. 201704412.
	Reported rel to ICP Ca Lyon, converted to SRM915a	24	-1.07	0.24005	0.049				-0.552						-0.575322	0.25282					0.0663674	0.287192					-0.451633		Dodat, P.-J., Tacail, T., Albalat, E., Gomez-Olivencia, A., Couture-Veschambre, C., Holliday, T., Madelaine, S., Martin, J. E., Rmoutilova, R., Maureille, B., & Balter, V. (2021). Isotopic calcium biogeochemistry of MIS 5 fossil vertebrate bones : application to the study of the dietary reconstruction of Regourdou 1 Neandertal fossil. Journal of Human Evolution, 151, 102925. https://doi.org/10.10…
	Reported rel to ICP Ca Lyon, converted to SRM915a	3	-0.91	0.06	0.034641				-0.392						-0.415322	0.0994681					-0.0936326	0.168687					-0.611633		Delette, L., Albalat, E., Télouk, P., Vanhaecke, F., & Balter, V. (2025). K, Mg, and Ca isotopic analysis from a single aliquot of thirteen biological certified reference materials. Journal of Analytical Atomic Spectrometry. https://doi.org/10.1039/D5JA00293A
	Reported rel to ICP Ca Lyon, converted to SRM915a	2	-0.92	0.02	0.0141421				-0.402						-0.425322	0.0818162					-0.0836326	0.158919					-0.601633		Delette, L., Albalat, E., Télouk, P., Vanhaecke, F., & Balter, V. (2025). K, Mg, and Ca isotopic analysis from a single aliquot of thirteen biological certified reference materials. Journal of Analytical Atomic Spectrometry. https://doi.org/10.1039/D5JA00293A
	Reported rel to ICP Ca Lyon, converted to SRM915a	534	-1.02961	0.136439	0.00590427				-0.511615						-0.534937	0.157827					0.025982	0.208496					-0.492018		pulled from ICP-Ca Lyon reported above
	Reported rel to WIGL, converted to SRM915a	28				-0.98	0.264575	0.05	-0.482884								-0.47812	0.282056	0.0496146	0.297684			-0.0236326	0.307986			-0.520749		Koutamanis, D., Roberts, G. L., & Dosseto, A. (2021). Inter- and intra-individual variability of calcium and strontium isotopes in modern Tasmanian wombats. Palaeogeography, Palaeoclimatology, Palaeoecology, 574, 110435. https://doi.org/10.1016/j.palaeo.2021.110435
	Reported rel to WIGL, converted to SRM915a	7				-0.992614	0.220583	0.0833726	-0.495497								-0.490733	0.241273	0.0370008	0.259369			-0.0110188	0.271131			-0.508135		this study
	Reported rel to WIGL, converted to SRM915a	12				-0.983853	0.254682	0.0735203	-0.486737								-0.481972	0.272798	0.0457617	0.288926			-0.0197797	0.29953			-0.516896		this study (previously unreported data, independently prepared and analyzed following Koutamanis et al. 2021 procedures from different batches of reference materials than those presented in the main text of the study)
	Reported rel to WIGL, converted to SRM915a	47				-0.982862	0.251044	0.0366185	-0.485746								-0.480982	0.269405	0.0467522	0.285725			-0.0207702	0.296443			-0.517887		pulled from WIGL reported above
	Reported rel to SRM915a	4							-0.48	0.05	0.025														-0.523633	0.165394	-0.523633	0.165394	Karasinski, J., Bulska, E., Halicz, L., Wojciechowski, M., & Krata, A. A. (2018). Direct determination of <scp> δ 44/42 Ca </scp> isotope ratio by ion chromatography/low‐resolution multicollector <scp>ICPMS</scp>. Journal of Mass Spectrometry, 53(1), 78–82. https://doi.org/10.1002/jms.4039
	Reported rel to SRM915a	4							-0.49	0.03	0.015														-0.513633	0.160484	-0.513633	0.160484	Bao, Z., Zong, C., Chen, K., Lv, N., & Yuan, H. (2020). Chromatographic purification of Ca and Mg from biological and geological samples for isotope analysis by MC-ICP-MS. International Journal of Mass Spectrometry, 448, 116268. https://doi.org/10.1016/j.ijms.2019.116268
	Reported rel to SRM915a	385							-0.495	0.05	0.00254824														-0.508633	0.165394	-0.508633	0.165394	Eisenhauer, A., Hastuti, A., Heuser, A., Kolevica, A., Brandt, B., Shroff, R., Oehme, J., & Müller, M. (2024). Calcium isotope composition in serum and urine for the assessment of bone mineral balance (BMB) – The Osteolabs post-market follow-up study. Bone, 188, 117210. https://doi.org/10.1016/j.bone.2024.117210
	Reported rel to SRM915a	5							-0.47	0.03	0.0134164														-0.533633	0.160484	-0.533633	0.160484	Lanping, F., Zhou, L., Yang, L., Zhang, W., Wang, Q., Shuoyun, T., & Hu, Z. (2018). A rapid and simple single-stage method for Ca separation from geological and biological samples for isotopic analysis by MC-ICP-MS. Journal of Analytical Atomic Spectrometry, 33, 413–421. https://doi.org/10.1039/C7JA00370F
	Reported rel to SRM915a	172							-0.5	0.05	0.00381246														-0.503633	0.165394	-0.503633	0.165394	Mayfield, K. K., Eisenhauer, A., Santiago Ramos, D. P., Higgins, J. A., Horner, T., Auro, M., Magna, T., Moosdorf, N., Charette, M. A., Eagle Gonneea, M., Brady, C. E., Komar, N., Peucker-Ehrenbrink, B., & Paytan, A. (2021). The Importance of Groundwater Discharge in the Marine Isotope Budgets of Li, Mg, Ca, Sr, and Ba. Nature Communications, 12(1), 148. https://doi.org/10.1038/s41467-020-20248-3
	Reported rel to SRM915a	17							-0.47	0.06	0.0145521														-0.533633	0.168687	-0.533633	0.168687	Retzmann, A., Walls, D., Miller, K. A., Irrgeher, J., Prohaska, T., & Wieser, M. E. (2022). A double-spike MC TIMS measurement procedure for low-amount Ca isotopic analysis of limited biological tissue samples. Analytical and Bioanalytical Chemistry, 414(1), 675–689. https://doi.org/10.1007/S00216-021-03650-8/FIGURES/7
	Reported rel to SRM915a, converted from δ44/40Ca	142							-0.493164	0.00976562	0.000819513														-0.510469	0.157958	-0.510469	0.157958	Heuser and Eisenhauer 2008 Geostand. Geoanal. Res. 32(3)
	Reported rel to SRM915a, converted from δ44/40Ca	42							-0.498047	0.126953	0.0195893														-0.505586	0.202416	-0.505586	0.202416	Heuser et al. 2016 Isotopes. Environ. Health Stud. 52(6), 633-648
	Reported rel to SRM915a, converted from δ44/40Ca	9							-0.50293	0.0927734	0.0309245														-0.500703	0.182927	-0.500703	0.182927	Li, Q., Thirlwall, M., & Müller, W. (2016). Ca isotopic analysis of laser-cut microsamples of (bio)apatite without chemical purification. Chemical Geology, 422, 1–12. https://doi.org/10.1016/j.chemgeo.2015.12.007
	Reported rel to SRM915a, converted from δ44/40Ca	780							-0.495216	0.0541452	0.00193871														-0.508416	0.166694	-0.508416	0.166694	pulled from SRM915a reported above
All (but WIGL)	Converted from ICP Ca Lyon to SRM915a & Reported directly rel to SRM915a	1314							-0.50188	0.0977539	0.00269672																-0.501752	0.185502	pulled from ICP Ca Lyon and SRM915a reported above
All (but ICP Ca Lyon)	Converted from WIGL to SRM915a & Reported directly rel to SRM915a	827							-0.494678	0.0793341	0.00275872																-0.508955	0.176491	pulled from WIGL and SRM915a reported above
All	Converted from ICP Ca Lyon & WIGL to SRM915a & Reported directly rel to SRM915a	1361							-0.501323	0.106733	0.00289315																-0.502309	0.190387	pulled from ICP Ca Lyon, WIGL and SRM915a reported above
	Measured rel to alpha-Ottawa	266										-1.00363	0.157655	0.00966647															this study
														All		0.157827		0.269405		0.285725		0.208496		0.296443		0.166694		0.106733	2SD from original reference standard
															-0.534937		-0.480982		0.0467522		0.025982	0.261392	-0.0207702	0.335758	-0.508416	0.229439	-0.502309	0.190387
														without approximation	-0.535201	dy/z - 915a/ICP Ca Lyon	-0.481223	dy/z - 915a/WIGL	0.0468004	dy/z - Lyon/WIGL	0.0260088	dy/z - ICP Ca Lyon/alpha-Ottawa	-0.0207906	dy/z - WIGL/alpha-Ottawa	-0.508668	dy/z - 915a/alpha-Ottawa	-0.502561	dy/z - 915a/alpha-Ottawa
														without approximation	0.535488	dz/y - ICP Ca Lyon/915a	0.481455	dz/y - WIGL/915a	-0.0467982	dz/y - WIGL/Lyon	-0.0260081	dz/y - alpha-Ottawa/ICP Ca Lyon	0.0207911	dz/y - alpha-Ottawa/WIGL	0.508927	dz/y - alpha-Ottawa/915a	0.502814	dz/y - alpha-Ottawa/915a
																										NRC mes rel to 915a	-0.501323	2 point calibration
																										Δ alpha to 915a	0.502309
SRM1400	Reported rel to ICP Ca Lyon, converted to SRM915a	26	-1.24	0.13	0.0254951				-0.722						-0.683868	0.219734					0.149094	0.207904					-0.368906		Tacail et al. 2016 J. Anal. At. Spec. 31(1)
	Reported rel to ICP Ca Lyon, converted to SRM915a	3	-1.21	0.04	0.023094				-0.692						-0.653868	0.181612					0.119094	0.167105					-0.398906		Dodat, P.-J., Martin, J. E., Olive, S., Hassler, A., Albalat, E., Boisserie, J.-R., Merceron, G., Souron, A., Maureille, B., & Balter, V. (2023). Limits of calcium isotopes diagenesis in fossil bone and enamel. Geochimica et Cosmochimica Acta, 351, 45–50. https://doi.org/10.1016/j.gca.2023.04.012
	Reported rel to ICP Ca Lyon, converted to SRM915a	35	-1.05	0.07	0.0118322				-0.532						-0.493868	0.190481					-0.0409061	0.176704					-0.558906		Dodat, P.-J., Albalat, E., Balter, V., Couture-Veschambre, C., Hardy, M., Henrion, J., Holliday, T., & Maureille, B. (2024). Diverse bone-calcium isotope compositions in Neandertals suggest different dietary strategies. Journal of Human Evolution, 193, 103566. https://doi.org/10.1016/j.jhevol.2024.103566
	Reported rel to ICP Ca Lyon, converted to SRM915a	3	-1.02	0.04	0.023094				-0.502						-0.463868	0.181612					-0.0709061	0.167105					-0.588906		Delette, L., Albalat, E., Télouk, P., Vanhaecke, F., & Balter, V. (2025). K, Mg, and Ca isotopic analysis from a single aliquot of thirteen biological certified reference materials. Journal of Analytical Atomic Spectrometry. https://doi.org/10.1039/D5JA00293A
	Reported rel to ICP Ca Lyon, converted to SRM915a	8	-1.07	0.06	0.0212132				-0.552						-0.513868	0.187037					-0.0209061	0.172986					-0.538906		Delette, L., Albalat, E., Télouk, P., Vanhaecke, F., & Balter, V. (2025). K, Mg, and Ca isotopic analysis from a single aliquot of thirteen biological certified reference materials. Journal of Analytical Atomic Spectrometry. https://doi.org/10.1039/D5JA00293A
	Reported rel to ICP Ca Lyon, converted to SRM915a	46	-1.05152	0.0696298	0.0102664				-0.533522						-0.49539	0.190345					-0.0393844	0.176557					-0.557384		pulled from ICP-Ca Lyon reported above (excluding outliers)
	Reported rel to WIGL, converted to SRM915a	10				-1.07	0.0948683	0.03	-0.572884								-0.544267	0.125288	-0.0184783	0.117679			-0.0209061	0.187947			-0.518022		Koutamanis, D., Roberts, G. L., & Dosseto, A. (2021). Inter- and intra-individual variability of calcium and strontium isotopes in modern Tasmanian wombats. Palaeogeography, Palaeoclimatology, Palaeoecology, 574, 110435. https://doi.org/10.1016/j.palaeo.2021.110435
	Reported rel to WIGL, converted to SRM915a	12				-1.09	0.138564	0.04	-0.592884								-0.564267	0.160926	-0.0384783	0.155075			-0.000906129	0.213364			-0.498022		Koutamanis, D., McCurry, M., Tacail, T., & Dosseto, A. (2023). Reconstructing Pleistocene Australian herbivore megafauna diet using calcium and strontium isotopes. Royal Society Open Science, 10(11). https://doi.org/10.1098/RSOS.230991
	Reported rel to WIGL, converted to SRM915a	4				-1.06657	0.10463	0.0523149	-0.569458								-0.540841	0.132833	-0.0150527	0.125681			-0.0243317	0.193059			-0.521448		this study
	Reported rel to WIGL, converted to SRM915a	21				-1.1242	0.291207	0.0635466	-0.627082								-0.598465	0.302488	-0.072677	0.299416			0.0332926	0.333355			-0.463824		this study (previously unreported data, independently prepared and analyzed following Koutamanis et al. 2021 procedures from different batches of reference materials than those presented in the main text of the study)
	Reported rel to WIGL, converted to SRM915a	47				-1.09903	0.215122	0.0313788	-0.601915								-0.573298	0.230162	-0.0475096	0.22611			0.00812518	0.269447			-0.488991		pulled from WIGL reported above
	Reported rel to SRM915a	4							-0.5	0.16	0.08														-0.590906	0.227869	-0.590906	0.227869	Karasinski, J., Bulska, E., Halicz, L., Wojciechowski, M., & Krata, A. A. (2018). Direct determination of <scp> δ 44/42 Ca </scp> isotope ratio by ion chromatography/low‐resolution multicollector <scp>ICPMS</scp>. Journal of Mass Spectrometry, 53(1), 78–82. https://doi.org/10.1002/jms.4039
	Reported rel to SRM915a	4							-0.54	0.04	0.02														-0.550906	0.167105	-0.550906	0.167105	Romaniello, S. J., Field, M. P., Smith, H. B., Gordon, G. W., Kim, M. H., & Anbar, A. D. (2015). Fully automated chromatographic purification of Sr and Ca for isotopic analysis. Journal of Analytical Atomic Spectrometry, 30(9), 1906–1912. https://doi.org/10.1039/c5ja00205b
	Reported rel to SRM915a	26							-0.49	0.03	0.00588348														-0.600906	0.164998	-0.600906	0.164998	Bao, Z., Zong, C., Chen, K., Lv, N., & Yuan, H. (2020). Chromatographic purification of Ca and Mg from biological and geological samples for isotope analysis by MC-ICP-MS. International Journal of Mass Spectrometry, 448, 116268. https://doi.org/10.1016/j.ijms.2019.116268
	Reported rel to SRM915a	4							-0.5	0.07	0.035														-0.590906	0.176704	-0.590906	0.176704	Lanping, F., Zhou, L., Yang, L., Zhang, W., Wang, Q., Shuoyun, T., & Hu, Z. (2018). A rapid and simple single-stage method for Ca separation from geological and biological samples for isotopic analysis by MC-ICP-MS. Journal of Analytical Atomic Spectrometry, 33, 413–421. https://doi.org/10.1039/C7JA00370F
	Reported rel to SRM915a	11							-0.55	0.09	0.027136														-0.540906	0.185538	-0.540906	0.185538	Retzmann, A., Walls, D., Miller, K. A., Irrgeher, J., Prohaska, T., & Wieser, M. E. (2022). A double-spike MC TIMS measurement procedure for low-amount Ca isotopic analysis of limited biological tissue samples. Analytical and Bioanalytical Chemistry, 414(1), 675–689. https://doi.org/10.1007/S00216-021-03650-8/FIGURES/7
	Reported rel to SRM915a	10							-0.571	0.0158114	0.005														-0.519906	0.163016	-0.519906	0.163016	Lewis, J., Luu, T.-H., Coath, C. D., Wehrs, H., Schwieters, J. B., & Elliott, T. (2022). Collision course; High-precision mass-independent and mass-dependent calcium isotope measurements using the prototype collision cell MC-ICPMS/MS, Proteus. Chemical Geology, 121185. https://doi.org/10.1016/j.chemgeo.2022.121185
	Reported rel to SRM915a	59							-0.519661	0.0889074	0.0115748														-0.571245	0.18501	-0.571245	0.18501	pulled from SRM915a reported above
All (but WIGL)	Converted from ICP Ca Lyon to SRM915a & Reported directly rel to SRM915a	105							-0.525733	0.0818359	0.00798637																-0.565173	0.181718	pulled from ICP Ca Lyon and SRM915a reported above
All (but ICP Ca Lyon)	Converted from WIGL to SRM915a & Reported directly rel to SRM915a	106							-0.556132	0.177152	0.0172065																-0.534774	0.240223	pulled from WIGL and SRM915a reported above
All	Converted from ICP Ca Lyon (outliers excluded) & WIGL to SRM915a & Reported directly rel to SRM915a	152							-0.549289	0.153954	0.0124873																-0.541617	0.223665	pulled from ICP Ca Lyon (outliers excluded), WIGL and SRM915a reported above
	Measured rel to alpha-Ottawa	30										-1.09091	0.162247	0.0296222															this study
														All but LGL outliers		0.190345		0.230162		0.22611		0.176557		0.269447		0.18501		0.153954	2SD from original reference standard
															-0.49539		-0.573298		-0.0475096		-0.0393844	0.239785	0.00812518	0.314525	-0.571245	0.246075	-0.541617	0.223665
														without approximation	-0.495665	dy/z - 915a/ICP Ca Lyon	-0.5736	dy/z - 915a/WIGL	-0.0475596	dy/z - Lyon/WIGL	-0.0394258	dy/z - ICP Ca Lyon/alpha-Ottawa	0.00813412	dy/z - WIGL/alpha-Ottawa	-0.571542	dy/z - 915a/alpha-Ottawa	-0.541914	dy/z - 915a/alpha-Ottawa
														without approximation	0.495911	dz/y - ICP Ca Lyon/915a	0.573929	dz/y - WIGL/915a	0.0475618	dz/y - WIGL/Lyon	0.0394274	dz/y - alpha-Ottawa/ICP Ca Lyon	-0.00813405	dz/y - alpha-Ottawa/WIGL	0.571869	dz/y - alpha-Ottawa/915a	0.542208	dz/y - alpha-Ottawa/915a
																										NRC mes rel to 915a	-0.58829	2 point calibration
																										Δ alpha to 915a	0.502617
Seawater	Reported rel to ICP Ca Lyon, converted to SRM915a	17	0.4116	0.1066	0.0274				0.9296						-0.496559	0.190736					-0.000299136	0.177512					-0.518299		Martin et al. 2015 Chem. Geol.415, 118-125; Tacail et al. 2014 J. Anal. At. Spec. 29(3), 529-535.;Tacail et al. 2016 J. Anal. At. Spec. 31(1), 152-162.
	Reported rel to ICP Ca Lyon, converted to SRM915a	3	0.4	0.05	0.0288675				0.918						-0.508159	0.165882					0.0113009	0.150489					-0.506699		Delette, L., Albalat, E., Télouk, P., Vanhaecke, F., & Balter, V. (2025). K, Mg, and Ca isotopic analysis from a single aliquot of thirteen biological certified reference materials. Journal of Analytical Atomic Spectrometry. https://doi.org/10.1039/D5JA00293A
	Reported rel to ICP Ca Lyon, converted to SRM915a	20	0.40986	0.0995224	0.0222539				0.92786						-0.498299	0.186873					0.00144086	0.173354					-0.516559		pulled from ICP-Ca Lyon reported above
	Reported rel to WIGL, converted to SRM915a	6				0.4	0.171464	0.07	0.897116								-0.509237	0.233158	-0.00986	0.198254			0.0113009	0.222591			-0.485815		Koutamanis, D., Roberts, G. L., & Dosseto, A. (2021). Inter- and intra-individual variability of calcium and strontium isotopes in modern Tasmanian wombats. Palaeogeography, Palaeoclimatology, Palaeoecology, 574, 110435. https://doi.org/10.1016/j.palaeo.2021.110435
	Reported rel to WIGL, converted to SRM915a	4				0.39	0.14	0.07	0.887116								-0.519237	0.211099	-0.01986	0.171769			0.0213009	0.199366			-0.475815		Koutamanis, D., McCurry, M., Tacail, T., & Dosseto, A. (2023). Reconstructing Pleistocene Australian herbivore megafauna diet using calcium and strontium isotopes. Royal Society Open Science, 10(11). https://doi.org/10.1098/RSOS.230991
	Reported rel to WIGL, converted to SRM915a	5				0.436335	0.192192	0.0859511	0.933451								-0.472902	0.248799	0.026475	0.216432			-0.0250341	0.238924			-0.52215		this study
	Reported rel to WIGL, converted to SRM915a	17				0.38462	0.0919087	0.0222911	0.881736								-0.524618	0.182784	-0.0252403	0.135469			0.0266812	0.169098			-0.470435		this study (previously unreported data, independently prepared and analyzed following Koutamanis et al. 2021 procedures from different batches of reference materials than those presented in the main text of the study)
	Reported rel to WIGL, converted to SRM915a	32				0.396257	0.130878	0.0231362	0.893373								-0.512981	0.205163	-0.0136035	0.16442			0.0150443	0.19307			-0.482072		pulled from WIGL reported above
	Reported rel to SRM915a	54							0.88	0.11	0.0149691														-0.468699	0.179574	-0.468699	0.179574	Wieser, M. E., Buhl, D., Bouman, C., & Schwieters, J. (2004). High precision calcium isotope ratio measurements using a magnetic sector multiple collector inductively coupled plasma mass spectrometer. Journal of Analytical Atomic Spectrometry, 19(7), 844–851. https://doi.org/10.1039/b403339f
	Reported rel to SRM915a	4							1.01	0.3	0.15														-0.598699	0.331884	-0.598699	0.331884	Karasinski, J., Bulska, E., Halicz, L., Wojciechowski, M., & Krata, A. A. (2018). Direct determination of <scp> δ 44/42 Ca </scp> isotope ratio by ion chromatography/low‐resolution multicollector <scp>ICPMS</scp>. Journal of Mass Spectrometry, 53(1), 78–82. https://doi.org/10.1002/jms.4039
	Reported rel to SRM915a	5							0.92	0.06	0.0268328														-0.508699	0.1541	-0.508699	0.1541	Romaniello, S. J., Field, M. P., Smith, H. B., Gordon, G. W., Kim, M. H., & Anbar, A. D. (2015). Fully automated chromatographic purification of Sr and Ca for isotopic analysis. Journal of Analytical Atomic Spectrometry, 30(9), 1906–1912. https://doi.org/10.1039/c5ja00205b
	Reported rel to SRM915a	34							0.9	0.1	0.0171499														-0.488699	0.173629	-0.488699	0.173629	Steuber, T., & Buhl, D. (2006). Calcium-isotope fractionation in selected modern and ancient marine carbonates. Geochimica et Cosmochimica Acta, 70(22), 5507–5521. https://doi.org/10.1016/j.gca.2006.08.028
	Reported rel to SRM915a	6							0.86	0.08	0.0326599														-0.448699	0.162932	-0.448699	0.162932	Bao, Z., Zong, C., Chen, K., Lv, N., & Yuan, H. (2020). Chromatographic purification of Ca and Mg from biological and geological samples for isotope analysis by MC-ICP-MS. International Journal of Mass Spectrometry, 448, 116268. https://doi.org/10.1016/j.ijms.2019.116268
	Reported rel to SRM915a	239							0.904	0.05	0.00323423														-0.492699	0.150489	-0.492699	0.150489	Eisenhauer, A., Hastuti, A., Heuser, A., Kolevica, A., Brandt, B., Shroff, R., Oehme, J., & Müller, M. (2024). Calcium isotope composition in serum and urine for the assessment of bone mineral balance (BMB) – The Osteolabs post-market follow-up study. Bone, 188, 117210. https://doi.org/10.1016/j.bone.2024.117210
	Reported rel to SRM915a	51							0.91	0.07	0.00980196														-0.498699	0.158262	-0.498699	0.158262	Lanping, F., Zhou, L., Yang, L., Zhang, W., Wang, Q., Shuoyun, T., & Hu, Z. (2018). A rapid and simple single-stage method for Ca separation from geological and biological samples for isotopic analysis by MC-ICP-MS. Journal of Analytical Atomic Spectrometry, 33, 413–421. https://doi.org/10.1039/C7JA00370F
	Reported rel to SRM915a	135							0.9	0.08	0.0068853														-0.488699	0.162932	-0.488699	0.162932	Mayfield, K. K., Eisenhauer, A., Santiago Ramos, D. P., Higgins, J. A., Horner, T., Auro, M., Magna, T., Moosdorf, N., Charette, M. A., Eagle Gonneea, M., Brady, C. E., Komar, N., Peucker-Ehrenbrink, B., & Paytan, A. (2021). The Importance of Groundwater Discharge in the Marine Isotope Budgets of Li, Mg, Ca, Sr, and Ba. Nature Communications, 12(1), 148. https://doi.org/10.1038/s41467-020-20248-3
	Reported rel to SRM915a	6							0.92	0.05	0.0204124														-0.508699	0.150489	-0.508699	0.150489	Retzmann, A., Walls, D., Miller, K. A., Irrgeher, J., Prohaska, T., & Wieser, M. E. (2022). A double-spike MC TIMS measurement procedure for low-amount Ca isotopic analysis of limited biological tissue samples. Analytical and Bioanalytical Chemistry, 414(1), 675–689. https://doi.org/10.1007/S00216-021-03650-8/FIGURES/7
	Reported rel to SRM915a	7							0.899	0.0158745	0.006														-0.487699	0.142825	-0.487699	0.142825	Lewis, J., Luu, T.-H., Coath, C. D., Wehrs, H., Schwieters, J. B., & Elliott, T. (2022). Collision course; High-precision mass-independent and mass-dependent calcium isotope measurements using the prototype collision cell MC-ICPMS/MS, Proteus. Chemical Geology, 121185. https://doi.org/10.1016/j.chemgeo.2022.121185
	Reported rel to SRM915a	61							0.97	0.21	0.0268877														-0.558699	0.25347	-0.558699	0.25347	Morgan, J. L. L., Gordon, G. W., Arrua, R. C., Skulan, J. L., Anbar, A. D., & Bullen, T. D. (2011). High-Precision Measurement of Variations in Calcium Isotope Ratios in Urine by Multiple Collector Inductively Coupled Plasma Mass Spectrometry. Analytical Chemistry, 83(18), 6956–6962. https://doi.org/10.1021/ac200361t
	Reported rel to SRM915a, converted from δ44/40Ca	5							0.952148	0.126953	0.0567752														-0.540848	0.190431	-0.540848	0.190431	Müller, M. N., Kısakürek, B., Buhl, D., Gutperlet, R., Kolevica, A., Riebesell, U., Stoll, H., & Eisenhauer, A. (2011). Response of the coccolithophores Emiliania huxleyi and Coccolithus braarudii to changing seawater Mg2+ and Ca2+ concentrations: Mg/Ca, Sr/Ca ratios and δ44/40Ca, δ26/24Mg of coccolith calcite. Geochimica et Cosmochimica Acta, 75(8), 2088–2102. https://doi.org/10.1016/j.gca.2011.…
	Reported rel to SRM915a, converted from δ44/40Ca	20							0.922852	0.0488281	0.0109183														-0.511551	0.150104	-0.511551	0.150104	Farkaš, J., Böhm, F., Wallmann, K., Blenkinsop, J., Eisenhauer, A., van Geldern, R., Munnecke, A., Voigt, S., & Veizer, J. (2007). Calcium isotope record of Phanerozoic oceans: Implications for chemical evolution of seawater and its causative mechanisms. Geochimica et Cosmochimica Acta, 71(21), 5117–5134. https://doi.org/10.1016/j.gca.2007.09.004
	Reported rel to SRM915a, converted from δ44/40Ca	19							0.927734	0.0146484	0.00336058														-0.516434	0.142694	-0.516434	0.142694	Huang, S., Farkaš, J., Yu, G., Petaev, M. I., & Jacobsen, S. B. (2012). Calcium isotopic ratios and rare earth element abundances in refractory inclusions from the Allende CV3 chondrite. Geochimica et Cosmochimica Acta, 77, 252–265. https://doi.org/10.1016/j.gca.2011.11.002
	Reported rel to SRM915a, converted from δ44/40Ca	55							0.908203	0.28	0.0377552														-0.496902	0.313922	-0.496902	0.313922	Amini, M., Eisenhauer, A., Böhm, F., Fietzke, J., Bach, W., Garbe-Schönberg, D., Rosner, M., Bock, B., Lackschewitz, K. S., & Hauff, F. (2008). Calcium isotope (δ44/40Ca) fractionation along hydrothermal pathways, Logatchev field (Mid-Atlantic Ridge, 14°45′N). Geochimica et Cosmochimica Acta, 72(16), 4107–4122. https://doi.org/10.1016/j.gca.2008.05.055
	Reported rel to SRM915a, converted from δ44/40Ca	4							0.952148	0.0439453	0.0219727														-0.540848	0.148587	-0.540848	0.148587	Bern: Hippler, D., Schmitt, A., Gussone, N., Heuser, A., Stille, P., Eisenhauer, A., & Nägler, T. F. (2003). Calcium Isotopic Composition of Various Reference Materials and Seawater. Geostandards Newsletter, 27(1), 13–19. https://doi.org/10.1111/j.1751-908X.2003.tb00709.x
	Reported rel to SRM915a, converted from δ44/40Ca	5							0.888672	0.0341797	0.0152856														-0.477371	0.145997	-0.477371	0.145997	Kiel: Hippler, D., Schmitt, A., Gussone, N., Heuser, A., Stille, P., Eisenhauer, A., & Nägler, T. F. (2003). Calcium Isotopic Composition of Various Reference Materials and Seawater. Geostandards Newsletter, 27(1), 13–19. https://doi.org/10.1111/j.1751-908X.2003.tb00709.x
	Reported rel to SRM915a, converted from δ44/40Ca	15							0.922852	0.0341797	0.00882516														-0.511551	0.145997	-0.511551	0.145997	Strasbourg: Hippler, D., Schmitt, A., Gussone, N., Heuser, A., Stille, P., Eisenhauer, A., & Nägler, T. F. (2003). Calcium Isotopic Composition of Various Reference Materials and Seawater. Geostandards Newsletter, 27(1), 13–19. https://doi.org/10.1111/j.1751-908X.2003.tb00709.x
	Reported rel to SRM915a, converted from δ44/40Ca	29							0.893555	0.538516	0.1														-0.482254	0.556908	-0.482254	0.556908	Böhm, F., Gussone, N., Eisenhauer, A., Dullo, W.-C., Reynaud, S., & Paytan, A. (2006). Calcium isotope fractionation in modern scleractinian corals. Geochimica et Cosmochimica Acta, 70(17), 4452–4462. https://doi.org/10.1016/j.gca.2006.06.1546
	Reported rel to SRM915a, converted from δ44/40Ca	11							0.864258	0.0146484	0.00441667														-0.452957	0.142694	-0.452957	0.142694	Teichert, B. M. A., Gussone, N., & Torres, M. E. (2009). Controls on calcium isotope fractionation in sedimentary porewaters. Earth and Planetary Science Letters, 279(3–4), 373–382. https://doi.org/10.1016/j.epsl.2009.01.011
	Reported rel to SRM915a, converted from δ44/40Ca	19							0.91	0.05	0.0114708														-0.498699	0.150489	-0.498699	0.150489	Gao, B., Su, B., Li, W., Yuan, M., Sun, J., Zhao, Y., & Liu, X. (2022). High-precision analysis of calcium isotopes using a Nu Sapphire collision cell (CC)-MC-ICP-MS. Journal of Analytical Atomic Spectrometry, 37(10), 2111–2121. https://doi.org/10.1039/D2JA00150K
	Reported rel to SRM915a, converted from δ44/40Ca	784							0.908762	0.159135	0.00568338														-0.497461	0.213239	-0.497461	0.213239	pulled from SRM915a reported above
All (but WIGL)	Converted from ICP Ca Lyon to SRM915a & Reported directly rel to SRM915a	804							0.909237	0.157996	0.0055721																-0.497936	0.212391	pulled from ICP Ca Lyon and SRM915a reported above
All (but ICP Ca Lyon)	Converted from WIGL to SRM915a & Reported directly rel to SRM915a	816							0.908159	0.158167	0.00553695																-0.496858	0.212517	pulled from WIGL and SRM915a reported above
All	Converted from ICP Ca Lyon & WIGL to SRM915a & Reported directly rel to SRM915a	836							0.90863	0.157096	0.00543329																-0.497329	0.211722	pulled from ICP Ca Lyon, WIGL and SRM915a reported above
	Measured rel to alpha-Ottawa	7										0.411301	0.14194	0.0536482															this study
														All		0.186873		0.205163		0.16442		0.173354		0.19307		0.213239		0.157096	2SD from original reference standard
															-0.498299		-0.512981		-0.0136035		0.00144086	0.22405	0.0150443	0.239631	-0.497461	0.256159	-0.497329	0.211722
														without approximation	-0.497847	dy/z - 915a/ICP Ca Lyon	-0.512515	dy/z - 915a/WIGL	-0.0135979	dy/z - Lyon/WIGL	0.00144027	dy/z - ICP Ca Lyon/alpha-Ottawa	0.0150384	dy/z - WIGL/alpha-Ottawa	-0.49701	dy/z - 915a/alpha-Ottawa	-0.496878	dy/z - 915a/alpha-Ottawa
														without approximation	0.498095	dz/y - ICP Ca Lyon/915a	0.512778	dz/y - WIGL/915a	0.0135981	dz/y - WIGL/Lyon	-0.00144027	dz/y - alpha-Ottawa/ICP Ca Lyon	-0.0150381	dz/y - alpha-Ottawa/WIGL	0.497257	dz/y - alpha-Ottawa/915a	0.497125	dz/y - alpha-Ottawa/915a
																										NRC mes rel to 915a	0.90863	2 point calibration
																										Δ alpha to 915a	0.497329
													2SD from Ottawa		mean	2SD	mean	2SD	mean	2SD	mean	2SD	mean	2SD	mean	2SD	mean	2SD
													0.157035	Average pond per n replicate (SRM1486, IAPSO)	-0.533614		-0.493943		0.0223044		0.0250961	0.344274	-0.00626306	0.4125	-0.502925	0.343889	-0.500414	0.284734
														Average pond per standard (SRM1486, IAPSO)	-0.516618		-0.496981		0.0165744		0.0137114		-0.00286295		-0.502939		-0.499819
														without approximation	-0.516524	dy/z - 915a/ICP Ca Lyon	-0.496869	dy/z - 915a/WIGL	0.0166013	dy/z - Lyon/WIGL	0.0137245	dy/z - ICP Ca Lyon/alpha-Ottawa	-0.00287614	dy/z - WIGL/alpha-Ottawa	-0.502839	dy/z - 915a/alpha-Ottawa	-0.499719	dy/z - 915a/alpha-Ottawa
														without approximation	0.516791	dz/y - ICP Ca Lyon/915a	0.497116	dz/y - WIGL/915a	-0.0166001	dz/y - WIGL/Lyon	-0.0137242	dz/y - alpha-Ottawa/ICP Ca Lyon	0.00287647	dz/y - alpha-Ottawa/WIGL	0.503092	dz/y - alpha-Ottawa/915a	0.499969	dz/y - alpha-Ottawa/915a

## Sheet: TABLE S5
TABLE S5: Sr doping experiments (δCa values reported relative to alpha-Ottawa).
		uncorrected δCa mean values (‰)			Sr2+ corrected δCa mean values (‰)			uncorrected δCa 2SD values (‰)			Sr2+ corrected δCa 2SD values (‰)			Sr2+ corrected δCa 2SE values (‰)		Sr/Ca
ID	n	44/42	43/42	44/43	44/42	43/42	44/43	44/42	43/42	44/43	44/42	43/42	44/43	44/42	43/42
Figure 5A: full 10^11ampl rotating
Sr/Ca 10-6	5	-0.0245157	0.076087	-0.100519	-0.0780697	-0.0246868	-0.0533495	0.124921	0.347958	0.258694	0.276375	0.644367	0.389169	0.123599	0.28817	1e-06
Sr/Ca 10-5	5	0.0157764	0.0166182	-0.000775436	0.0383771	0.0596281	-0.0212501	0.0571691	0.126136	0.147393	0.137862	0.258804	0.17839	0.0616538	0.11574	1e-05
Sr/Ca 10-4	5	0.163077	0.259762	-0.0966291	-0.00704999	-0.0613994	0.0543926	0.107846	0.482312	0.405327	0.124	0.550521	0.440367	0.0554543	0.2462	0.0001
Sr/Ca 10-3	5	1.71978	3.15674	-1.43236	0.00767275	-0.0772671	0.0849613	0.0505529	0.500562	0.48488	0.101643	0.35493	0.41359	0.0454559	0.15873	0.001
Sr/Ca 10-2	5	17.6489	33.1273	-14.9821	0.0385635	-0.134674	0.173276	0.182027	0.337537	0.258644	0.378968	0.578585	0.279879	0.169479	0.258751	0.01
Sr/Ca 10-1	4	166.019	311.498	-110.925	1.04664	-0.0960805	1.14283	1.1832	2.08518	0.555849	0.112643	0.260452	0.332376	0.0563214	0.130226	0.1
Figure 5B: hybrid 10^11 & 10^13 ampl (outdated gain calibration)
Sr/Ca 10-6	5	0.0144263	-0.00972448	-0.00545086	-0.00604045	-0.0518348	0.0458056	0.0749292	0.167707	0.159258	0.069273	0.220349	0.234094	0.0309798	0.0985432	1e-06
Sr/Ca 10-5	5	-0.00583508	-0.00212128	0.038505	-0.0332142	-0.0208793	-0.0123326	0.0769213	0.100009	0.162293	0.0766639	0.231392	0.178477	0.0342852	0.103482	1e-05
Sr/Ca 10-4	5	0.177296	0.386049	-0.203027	-0.017535	0.0217427	-0.0392606	0.077031	0.378706	0.349629	0.0388409	0.318976	0.32413	0.0173702	0.142651	0.0001
Sr/Ca 10-3	5	1.81937	3.49241	-1.64291	0.0281506	0.106763	-0.0785989	0.0594006	0.42713	0.312921	0.0532753	0.20356	0.191055	0.0238254	0.0910348	0.001
Sr/Ca 10-2	5	18.1382	34.1074	-15.4984	0.233514	0.498214	-0.264558	0.148582	0.467744	0.346245	0.0450939	0.25017	0.261755	0.0201666	0.11188	0.01
Sr/Ca 10-1	4	171.713	322.3	-113.867	2.3632	4.16454	-1.79386	0.839209	1.74874	0.582768	0.165665	0.227794	0.227775	0.0828324	0.113897	0.1
Figure 5C: hybrid 10^11 & 10^13 ampl (updated gain calibration)
Sr/Ca 10-5	4	0.00296166	-0.183198	0.251429	-0.00113041	-0.0457549	0.0446112	0.109237	0.501475	0.445375	0.151819	0.300367	0.421395	0.0759096	0.150184	1e-05
Sr/Ca 10-4	7	0.232758	0.400802	-0.0938927	0.0115278	0.0212458	-0.00973505	0.0867157	0.694831	0.900365	0.0869408	0.200541	0.267917	0.0328605	0.0757975	0.0001
Sr/Ca 10-3	5	2.2306	4.18188	-1.91964	-0.0564256	-0.0136298	-0.0428698	0.192366	0.534034	0.713549	0.154504	0.248549	0.260363	0.0690962	0.111154	0.001
Sr/Ca 10-2	2	23.6103	44.4966	-19.987	-0.0137805	0.0409313	-0.0547324	1.80518	3.29328	1.39803	0.041209	0.0642222	0.0230669	0.0291392	0.045412	0.01
Hybrid 10^11 & 10^13 ampl (updated gain calibration)
CACB-1 (no chromatography)	9	1.03553	2.03503	-0.982764	-0.0602238	-0.0649181	0.00472013	0.229622	0.710219	0.638746	0.253167	0.478687	0.428644	0.0843889	0.159562	0.000489
Sr-spiked SRM1486	4	1.16284	3.55241	-2.40657	-0.965813	-0.40451	-0.561529	0.144613	0.127966	0.102093	0.0654744	0.0711902	0.0918288	0.0327372	0.0355951	0.001
